# Supplementary material
Source: PubMed Central journal article supplement (PMC8076913)

## Captions:

**Supplemental Table 1:** The ELISA assay was performed in triplicate with varying antigen concentrations as shown. A set of 36 sera consisting of 12 healthy, 12 benign gynecological disease, and 12 high-grade serous ovarian cancer was run on three separate ELISA experiments, as well as twice on western blot. Sensitivity is calculated relative to healthy and benign samples at 90% specificity. With these six markers, a total of 10/12 samples were positive using at least one assay. Samples positive for each assay are shaded in gray per antigen.

**Supplemental Figure 1:** A serum set of 34 HGSOC samples, 9 benign samples, and 11 healthy samples were processed on Euroimmun and Ravo Diagnostika line blots, with 20 antigens total.

A: Image of Euroimmun myositis line blot and Ravo Diagnostika paraneoplastic antigen line blot with anti-HARS and anti-TRIM positive control serum and anti-CDR2 positive control serum, respectively.

B: Heat map of reactivity of line blots with HGSOC serum, as scored from 0-4.

C: Heat map of reactivity of line blots with benign serum, as scored from 0-4.

D: Heat map of reactivity of line blots with healthy serum, as scored from 0-4.

**Supplemental Figure 2:** Late-Stage HGSOC sample positive for TRIM21 (800:700 standardized ratio  $> 2$ ) on western blot, which was not detected by ELISA (Standardized background-corrected intensity  $< 2$ ). A) Secondary antibody anti-HIS tag IgG loading control. B) Secondary antibody anti-human IgG.

**Supplemental Table 1: Results from preliminary screening of purified recombinant proteins on western blot and ELISA.**

| Antigen                 | HARS                                                      |      |       |      |      | TRIM21       |      |       |      |        | CDR2       |      |       |      |       | P3F10      |       |      |      | TP53            |       |      | NY-ESO-1  |  |
|-------------------------|-----------------------------------------------------------|------|-------|------|------|--------------|------|-------|------|--------|------------|------|-------|------|-------|------------|-------|------|------|-----------------|-------|------|-----------|--|
|                         | Assay, n=36,<br>Western Blot: W1, W2<br>ELISA: E1, E2, E3 |      |       |      |      |              |      |       |      |        |            |      |       |      |       |            |       |      |      |                 |       |      |           |  |
|                         | W1                                                        | W2   | E1    | E2   | E3   | W1           | W2   | E1    | E2   | E3     | W1         | W2   | E1    | E2   | E3    | W2         | E1    | E2   | E3   | W2              | E2    | E3   | E3        |  |
| Antigen Concentration   | 1ug                                                       | 1ug  | 0.3ug | 1ug  | 3ug  | 0.6ug        | 1ug  | 0.3ug | 1ug  | 0.75ug | 1ug        | 1ug  | 0.3ug | 1ug  | 1.5ug | 1ug        | 0.3ug | 1ug  | 2ug  | 1ug             | 0.3ug | 1ug  | 1ug       |  |
| Patient ID              |                                                           |      |       |      |      |              |      |       |      |        |            |      |       |      |       |            |       |      |      |                 |       |      |           |  |
| HGSOC Samples           |                                                           |      |       |      |      |              |      |       |      |        |            |      |       |      |       |            |       |      |      |                 |       |      |           |  |
| O1                      |                                                           |      |       |      |      |              |      |       |      |        |            |      |       |      |       |            |       |      |      |                 |       |      |           |  |
| O2                      |                                                           |      |       |      |      |              |      |       |      |        |            |      |       |      |       |            |       |      |      |                 |       |      |           |  |
| O3                      |                                                           |      |       |      |      |              |      |       |      |        |            |      |       |      |       |            |       |      |      |                 |       |      |           |  |
| O4                      |                                                           |      |       |      |      |              |      |       |      |        |            |      |       |      |       |            |       |      |      |                 |       |      |           |  |
| O5                      |                                                           |      |       |      |      |              |      |       |      |        |            |      |       |      |       |            |       |      |      |                 |       |      |           |  |
| O6                      |                                                           |      |       |      |      |              |      |       |      |        |            |      |       |      |       |            |       |      |      |                 |       |      |           |  |
| O7                      |                                                           |      |       |      |      |              |      |       |      |        |            |      |       |      |       |            |       |      |      |                 |       |      |           |  |
| O8                      |                                                           |      |       |      |      |              |      |       |      |        |            |      |       |      |       |            |       |      |      |                 |       |      |           |  |
| O9                      |                                                           |      |       |      |      |              |      |       |      |        |            |      |       |      |       |            |       |      |      |                 |       |      |           |  |
| O10                     |                                                           |      |       |      |      |              |      |       |      |        |            |      |       |      |       |            |       |      |      |                 |       |      |           |  |
| O11                     |                                                           |      |       |      |      |              |      |       |      |        |            |      |       |      |       |            |       |      |      |                 |       |      |           |  |
| O12                     |                                                           |      |       |      |      |              |      |       |      |        |            |      |       |      |       |            |       |      |      |                 |       |      |           |  |
| HGSOC (+), n=12         | 2                                                         | 2    | 2     | 2    | 1    | 3            | 3    | 2     | 2    | 1      | 2          | 2    | 0     | 0    | 0     | 2          | 2     | 2    | 2    | 4               | 4     | 4    | 1         |  |
| Sensitivity             | 0.17                                                      | 0.17 | 0.17  | 0.17 | 0.08 | 0.25         | 0.25 | 0.17  | 0.17 | 0.08   | 0.17       | 0.17 | 0.00  | 0.00 | 0.00  | 0.17       | 0.17  | 0.17 | 0.17 | 0.33            | 0.33  | 0.33 | 0.08      |  |
| Total Positive Samples: | O2, O10                                                   |      |       |      |      | O9, O10, O11 |      |       |      |        | O6, O7     |      |       |      |       | O1, O5     |       |      |      | O3, O4, O5, O11 |       |      | O7        |  |
| Total Sensitivity:      | 2/12 (17%)                                                |      |       |      |      | 3/12 (25%)   |      |       |      |        | 2/12 (17%) |      |       |      |       | 2/12 (17%) |       |      |      | 4/12 (33%)      |       |      | 1/12 (8%) |  |
|                         | 10/12 (83%)                                               |      |       |      |      |              |      |       |      |        |            |      |       |      |       |            |       |      |      |                 |       |      |           |  |

# Supplemental Figure 1: 20 paraneoplastic antigens analyzed on commercial line blots with HGSOC sera.

A.

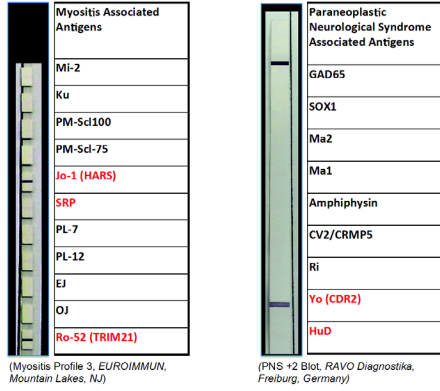

B.

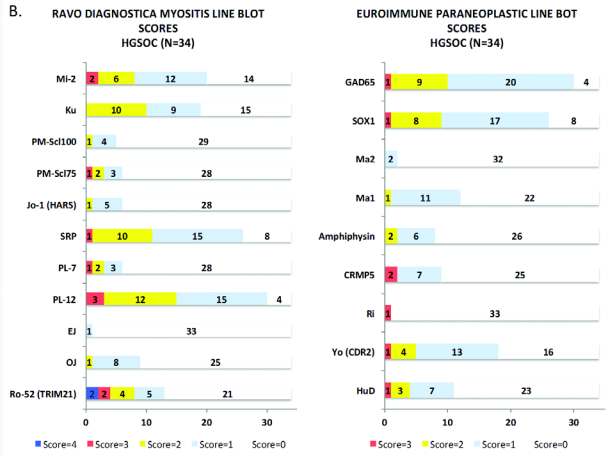

C.

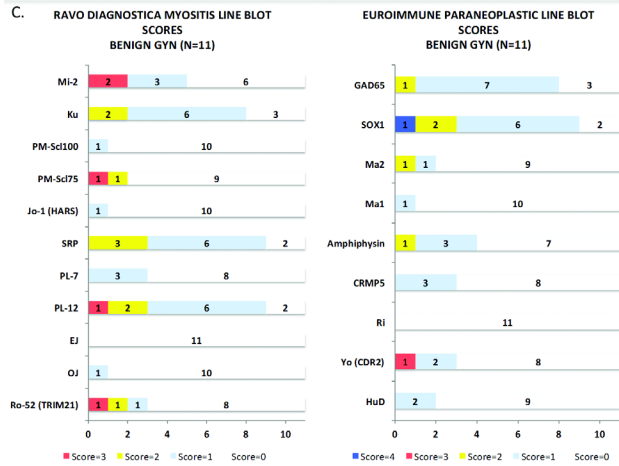

D.

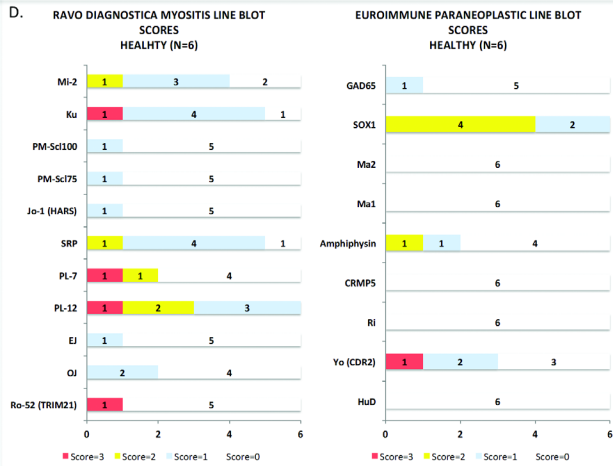

**Supplemental Figure 2. Western blot of late-Stage HGSOC sample positive for TRIM21, Validation I.**

Validation I: Western Blot

Late Stage HGSOC Sample

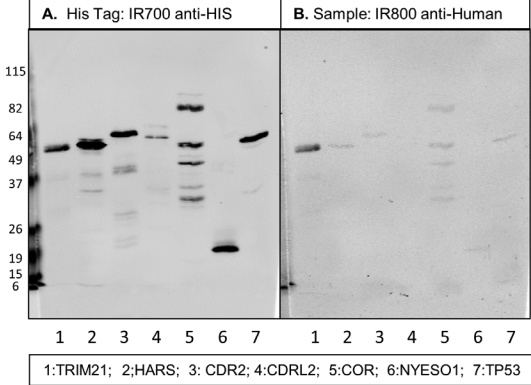

Supplement: NIHMS1690479-supplement-Supplement.pdf [file NIHMS1690479-supplement-Supplement.pdf]
