# Supplementary material
Source: PubMed Central journal article supplement (PMC8076913)

Supplemental Figure 3

Combination of NY-ESO-1 & PAX8 & TP53 & TRIM21

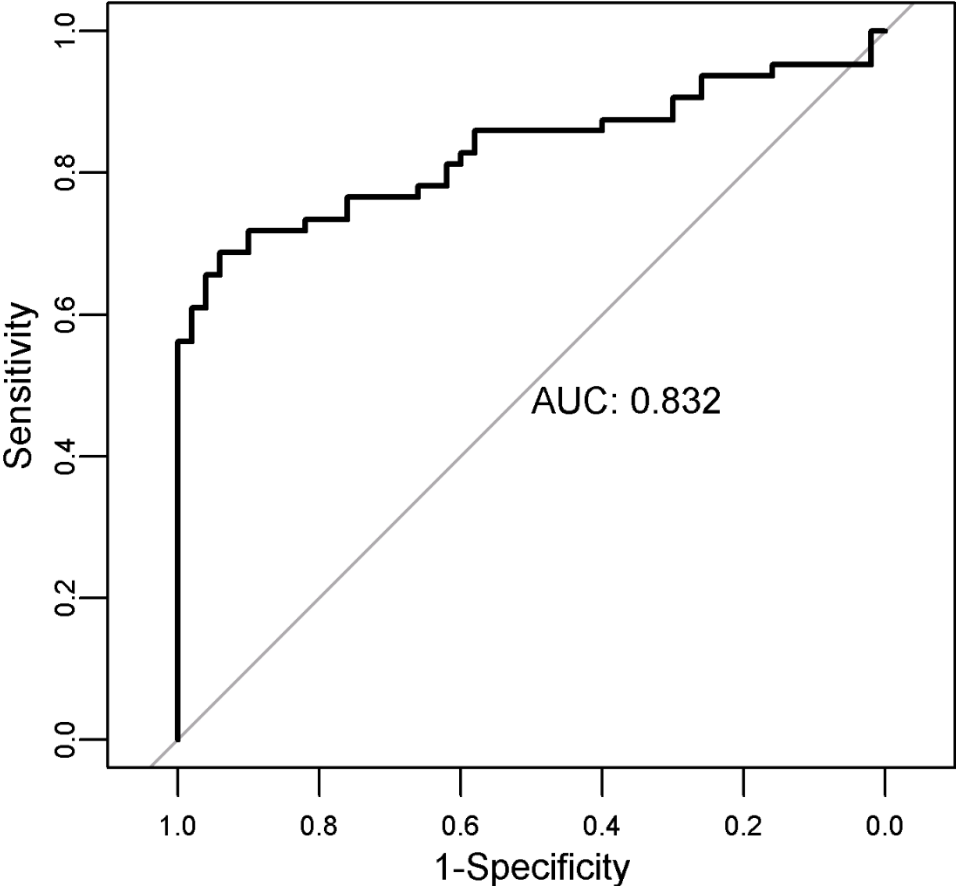

Supplement: NIHMS1690479-supplement-Supp_Fig_3.pdf [file NIHMS1690479-supplement-Supp_Fig_3.pdf]
